# Supplementary material
Source: PubMed Central journal article supplement (PMC9630408)
Supplement: 41467_2022_34265_MOESM1_ESM.pdf [file 41467_2022_34265_MOESM1_ESM.pdf]

## Supplementary Information

### **L-threonine promotes healthspan by expediting ferritin-dependent ferroptosis inhibition in *C. elegans***

Juewon Kim<sup>1,\*</sup>, Yunju Jo<sup>2</sup>, Donghyun Cho<sup>1</sup>, Dongryeol Ryu<sup>2,\*</sup>

<sup>1</sup>Basic Research & Innovation Division, Amorepacific R&D Center, Yongin, Korea

<sup>2</sup>Department of Molecular Cell Biology, Sungkyunkwan University School of Medicine, Suwon, Korea.

\*Correspondence: Juewon Kim ([kimjw@amorepacific.com](mailto:kimjw@amorepacific.com)) and Dongryeol Ryu ([freefall@skku.edu](mailto:freefall@skku.edu))

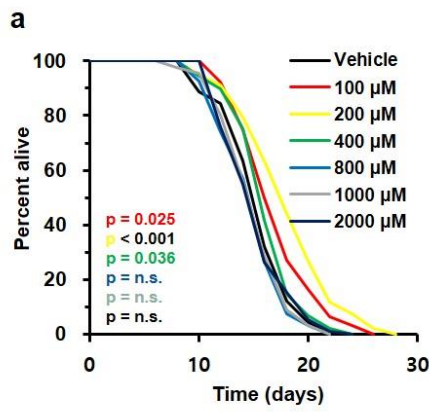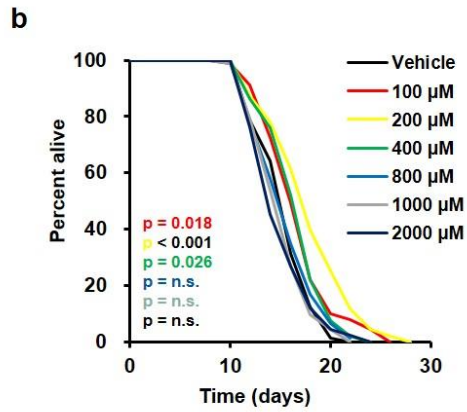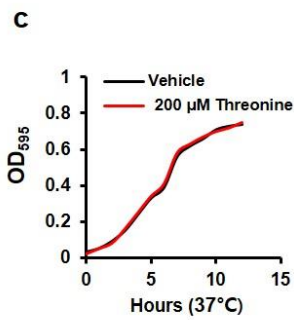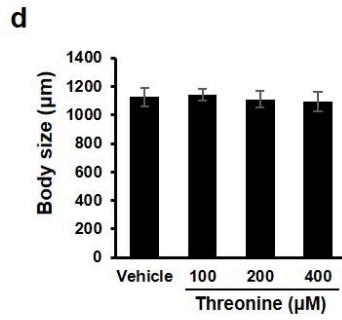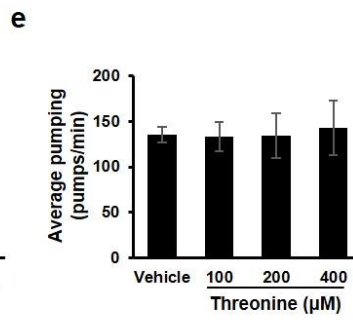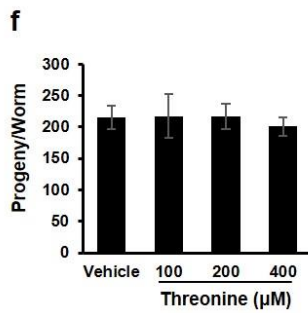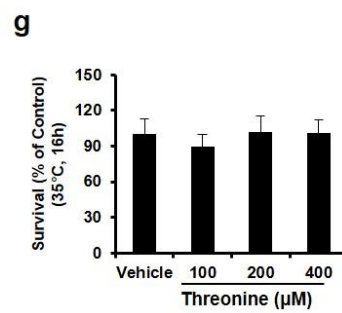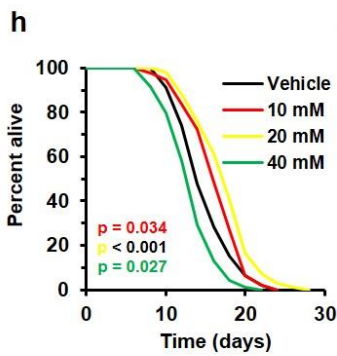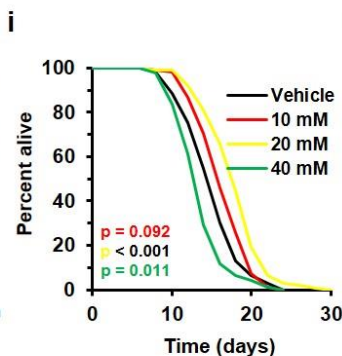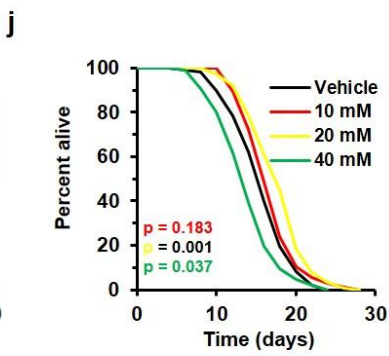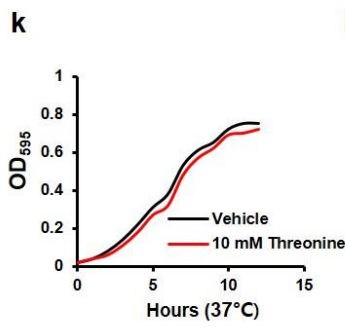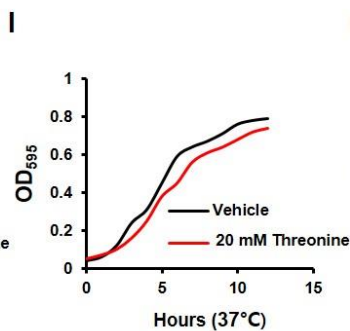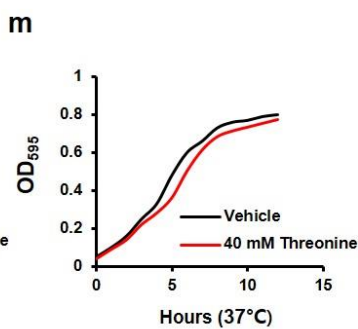

**Supplementary Fig.1 | Threonine prolongs lifespan without diet or fertility changes.** **a-b**, Survival curves depicted in Fig. 1a with additional replicates (p-values listed, log-rank test). **c**, Threonine does not alter the growth rate of the OP50 *E. coli*, which is the standard food source for nematodes. **d-g**, Effects of threonine versus the vehicle in animals regarding **(d)** body size ( $p > 0.5$ ,  $n = 6$ ), **(e)** average pumping ( $p > 0.05$ , Student's *t*-test,  $n = 10$  worms  $\times$  3 assays each), **(f)** progeny ( $p > 0.05$ , Student's *t*-test, three independent measurement), and **(g)** thermotolerance ( $P > 0.05$ , Student's *t*-test,  $n = 20$  worms  $\times$  9 measurements each). **h-j**, Survival curves of high concentration threonine (10, 20, and 40 mM) with additional repeats (p-values listed, log-rank test). Data of lifespan analysis are displayed in Supplementary Table 1. **k-m**, High concentration of threonine inhibited the growth rate of the nematode food source, OP50 strain. Error bars represent the mean  $\pm$  s.d.

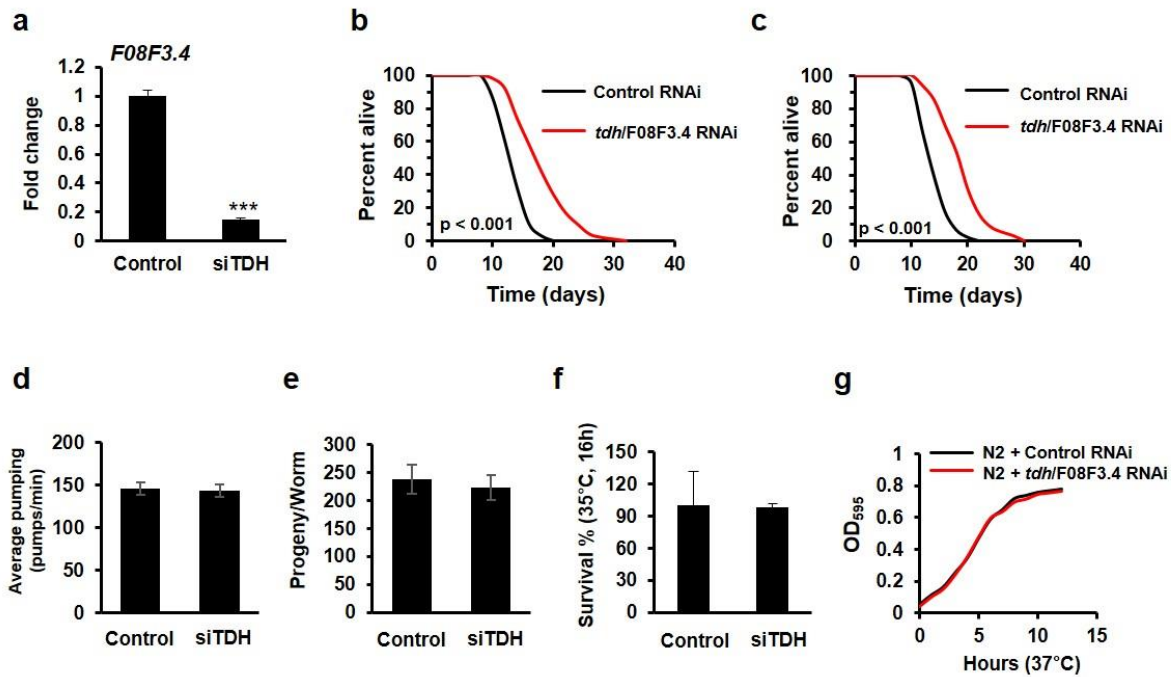

**Supplementary Fig.2 | Downregulation of threonine dehydrogenase extends lifespan without diet or fertility changes.** **a**, The efficiency of *tdh/F08F3.4* knockdown by RNAi was confirmed by quantitative RT-PCR (qRT-PCR) of the mRNA (71% decrease, \*\*\* $p < 0.001$ , Student's *t*-test, three independent measurements). **b-c**, Survival curves depicted in Fig. 2k with additional replicates ( $p < 0.001$ , log-rank test). Survival data represented in Supplementary Table 1. **d-g**, Effects of *tdh/F08F3.4* RNAi versus control RNAi-treated animals regarding (**d**) average pumping ( $p = 0.748$ , Student's *t*-test,  $n = 10$  worms  $\times$  3 assays each), (**e**) progeny ( $p = 0.487$ , Student's *t*-test, three independent measurement), and (**f**) thermotolerance ( $p = 0.92$ , Student's *t*-test,  $n = 20$  worms  $\times$  9 measurements each). **g**, *tdh/F08F3.4* RNAi does not change the growth rate of OP50 *E. coli*. Error bars represent the mean  $\pm$  s.d.

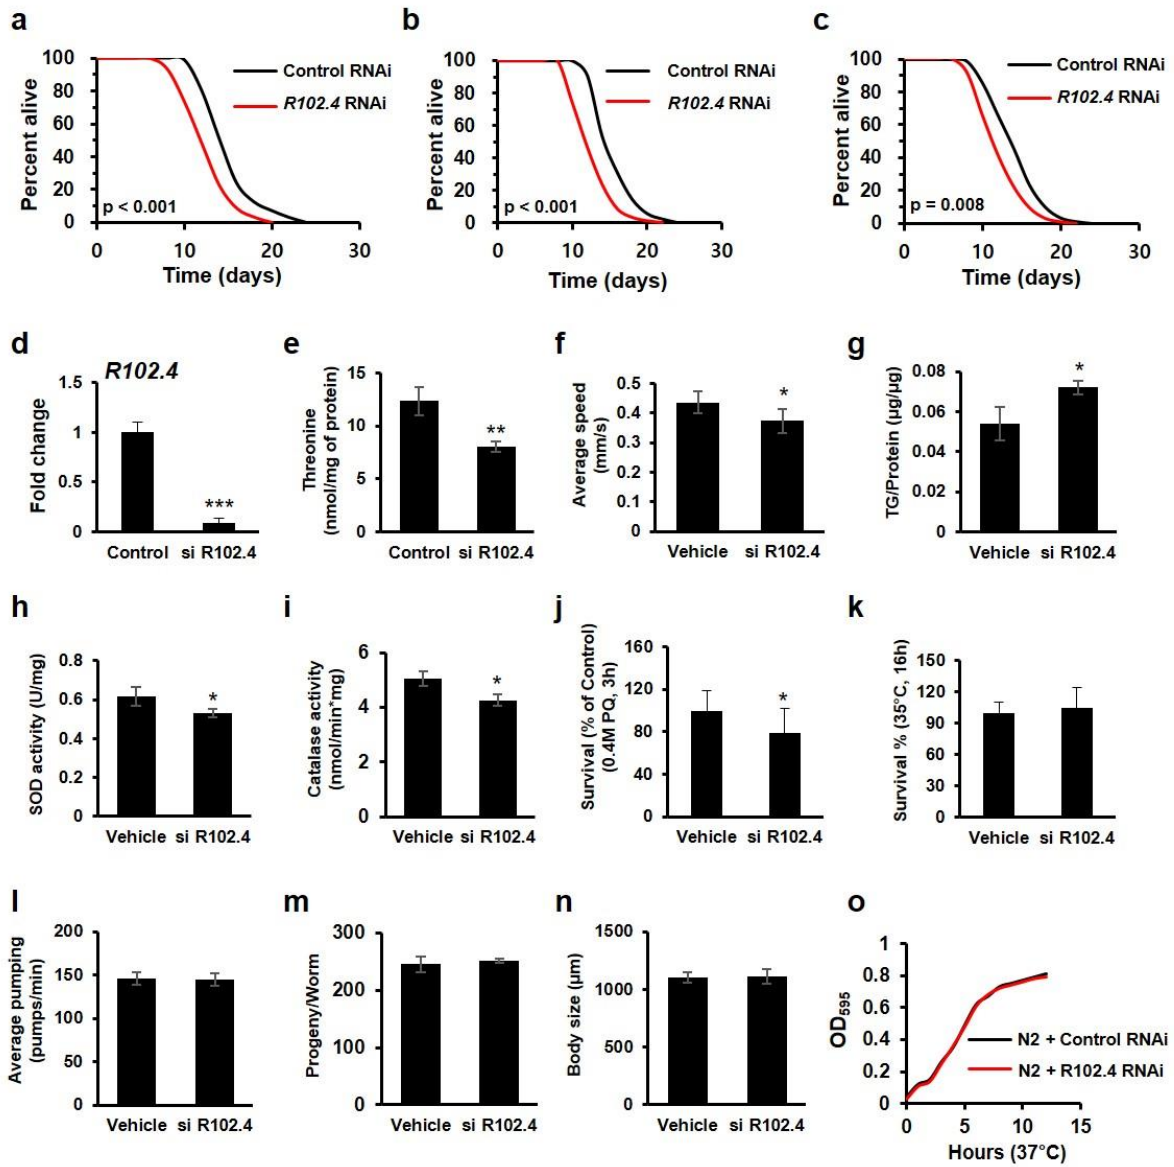

**Supplementary Fig.3 | Downregulation of threonine anabolic enzyme *R102.4* shortens lifespan and reduces healthspan.** **a-c**, Survival curves of *R102.4* RNAi versus control RNAi (black) with additional replicates ( $p < 0.001$  or  $p = 0.008$ , log-rank test). Lifespan assay data are depicted in Supplementary Table 1. **d**, The efficiency of *R102.4* knockdown by RNAi was confirmed by quantitative RT-PCR (qRT-PCR) of the mRNA (89.9% decrease,  $***p < 0.001$ , Student's *t*-test, 3 independent measurement). **e-o**, Effects of *R102.4* RNAi versus control RNAi regarding (**e**) threonine content ( $**p = 0.006$ , Student's *t*-test,  $n = 3$  worm pellets), (**f**) average speed ( $*p = 0.021$ , Student's *t*-test,  $n = 10-15$  worms  $\times$  3 assays each), (**g**) triglyceride (TG) content ( $*p = 0.025$ , Student's *t*-test,  $n = 3$  worm pellets), (**h**) superoxide dismutase (SOD) activity ( $*p = 0.05$ , Student's *t*-test,  $n = 3$  worm pellets), (**i**) catalase activity ( $**p = 0.014$ , Student's *t*-test,  $n = 3$  worm pellets), (**j**) oxidative stress resistance ( $*p = 0.049$ , Student's *t*-test,  $n = 20$  worms  $\times$  9 measurements each), (**k**) thermotolerance ( $p = 0.726$ , Student's *t*-test,  $n = 20$  worms  $\times$  9 measurements each), (**l**) average pumping ( $p = 0.852$ , Student's *t*-test,  $n = 10$  worms  $\times$  3 assays each), (**m**) progeny ( $p = 0.498$ , Student's *t*-test, three independent measurements), and (**n**) body size ( $p = 0.906$ ,  $n = 6$ ). (**o**) *R102.4* RNAi does not shift the growth rate of the OP50 *E. coli*. Error bars represent the mean  $\pm$  s.d.

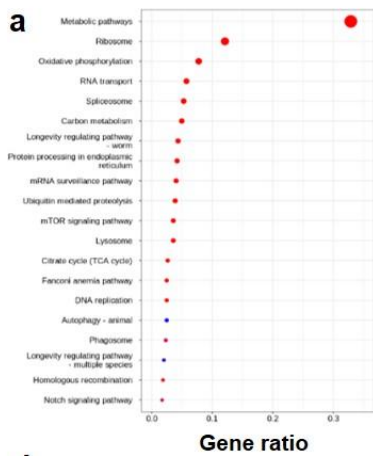

**b. Up-regulated**

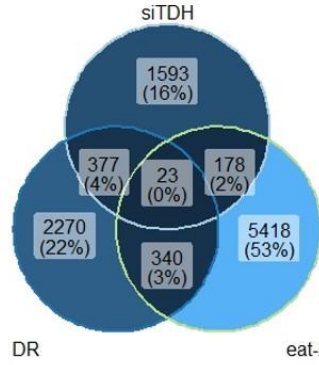

**c. Down-regulated**

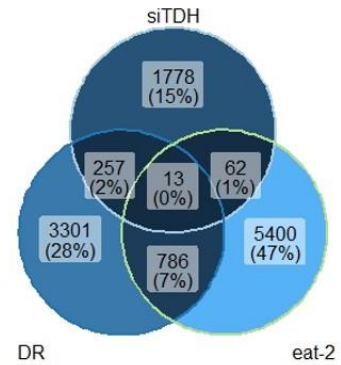

**d**

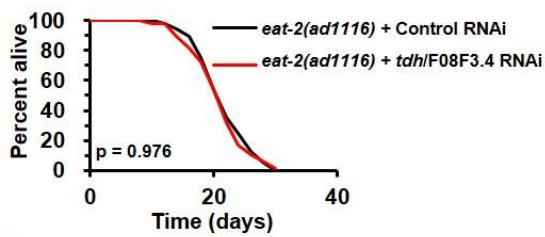

**e**

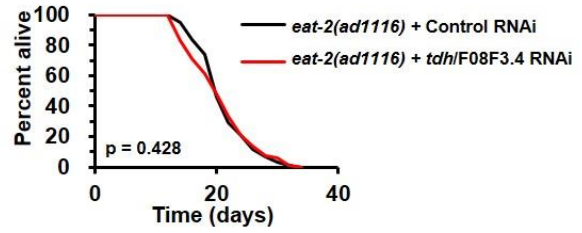

**f**

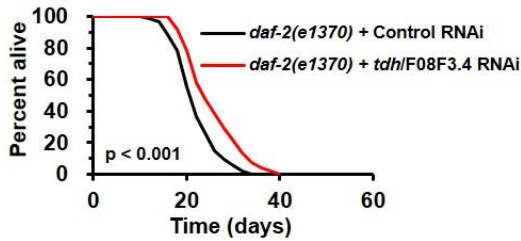

**g**

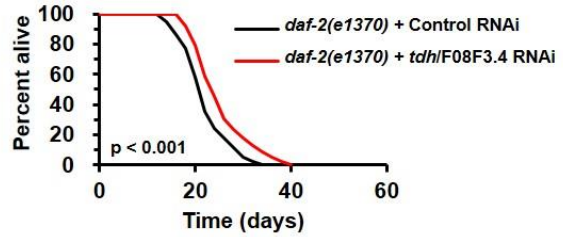

**h**

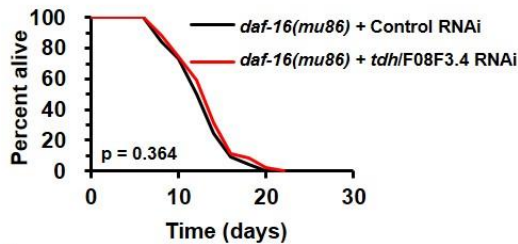

**i**

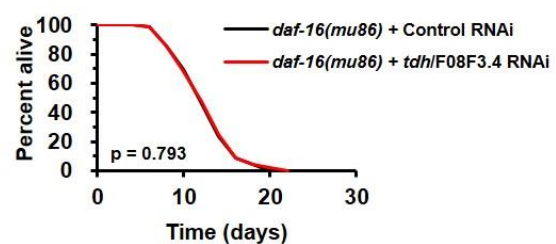

**j**

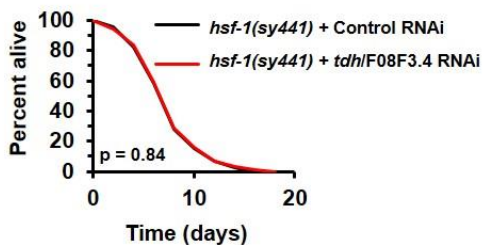

**k**

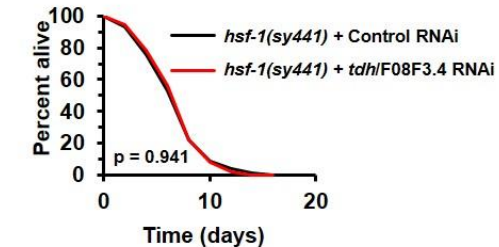

**Supplementary Fig.4 | Downregulation of threonine dehydrogenase alter metabolic process by DAF-16 and HSF-1-mediated mechanism.** **a**, Functional annotation clustering for the DEGs from the volcano and smear plot of Fig. 3b-c ( $p < 0.05$ ) determined by gene enrichment analysis using the KEGG database ( $p < 0.05$ ). **b-c**, Venn analysis of transcripts that are regulated by *tdh/F08F3.4* RNAi (siTDH), dietary restriction (DR), and *eat-2* mutant (*eat-2*); **(b)** upregulated and **(c)** downregulated genes. **d-e**, Survival curves depicted in Fig. 3d with additional replicates (p-value listed, log-rank test). **f-g**, Survival curves depicted in Fig. 3e with additional replicates ( $p < 0.001$ , log-rank test). **h-i**, Survival curves depicted in Fig. 3f with additional replicates (p-value listed, log-rank test). **j-k**, Survival curves depicted in Fig. 3g with additional replicates (p-value listed, log-rank test). Survival data are presented in Supplementary Table 1.



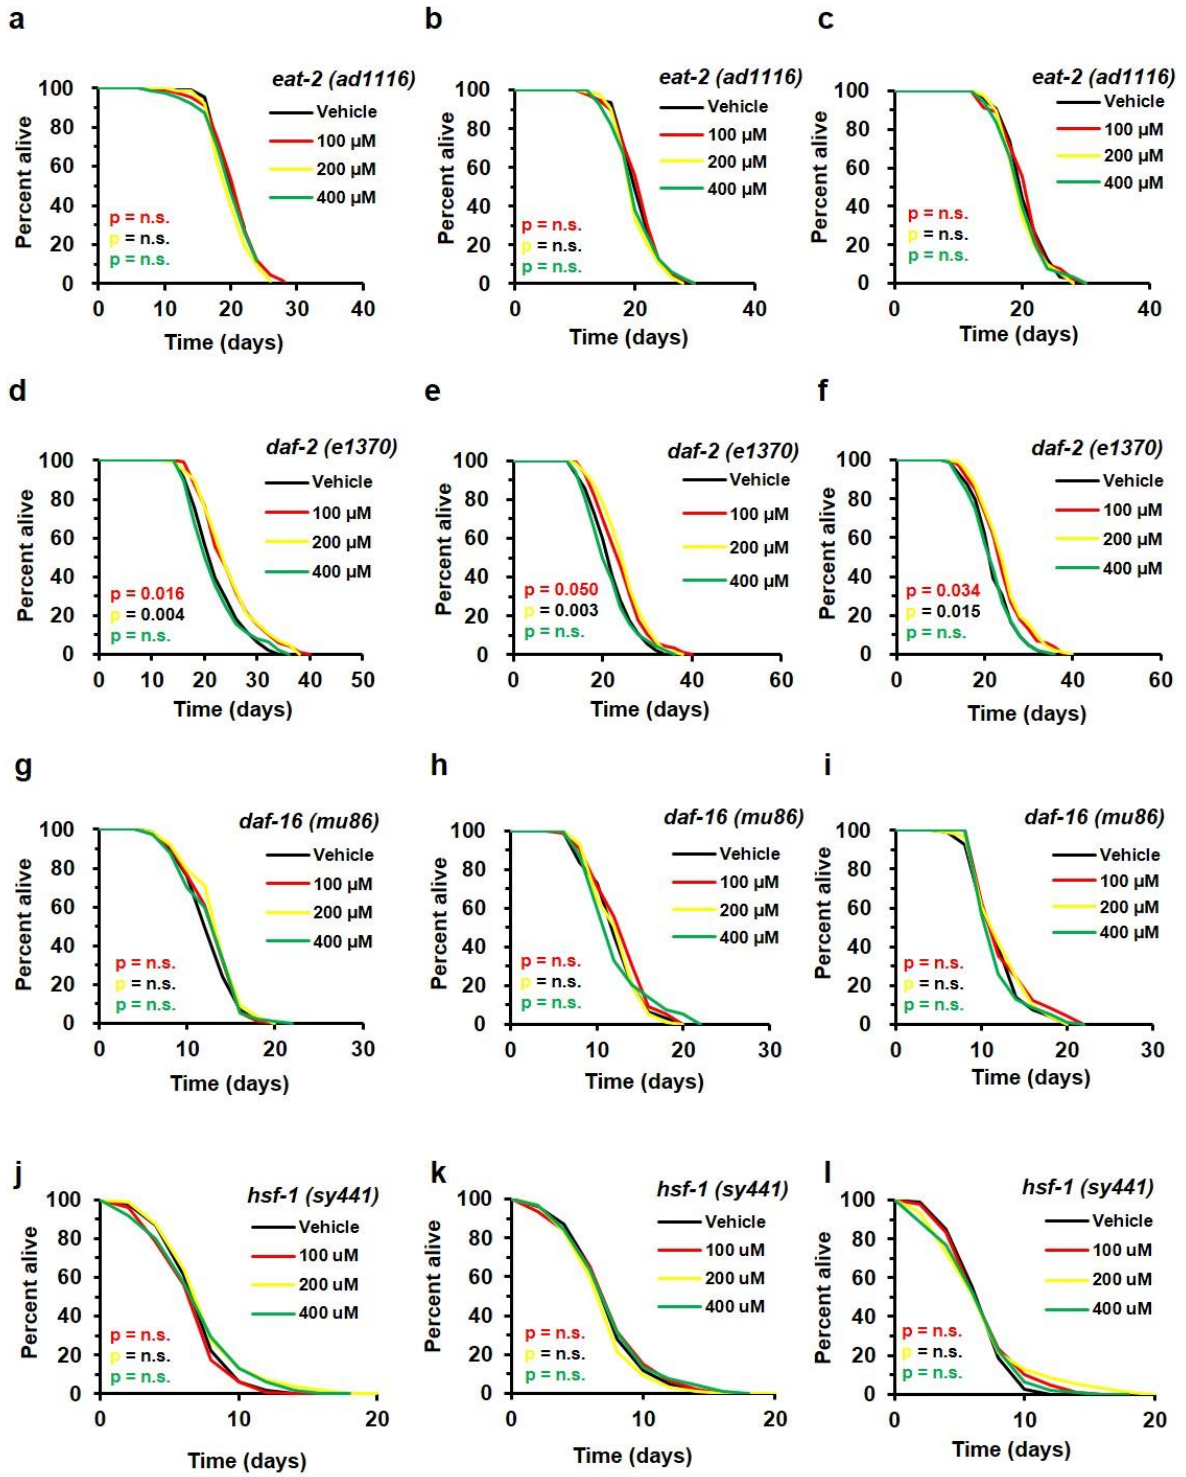

**Supplementary Fig.5 | Threonine supplementation extends lifespan by a DAF-16 and HSF-1-mediated mechanism. a-l**, Effects of L-threonine (100, 200, and 400  $\mu$ M) versus the vehicle (black) on lifespan of **a-c**, *eat-2(ad465)*, **d-f**, *daf-2(e1370)*, **g-i**, *daf-16(m26)*, and **j-l**, *hsf-1(sy441)* with additional replicates; colour coding is assigned to all subsequent panels. P-value and lifespan assay data summarized in Supplementary Table 1.

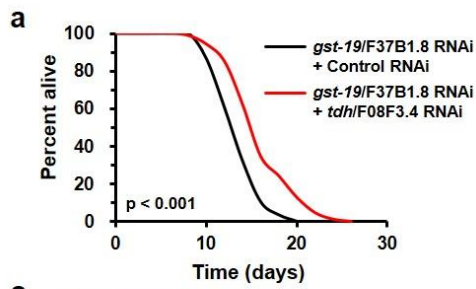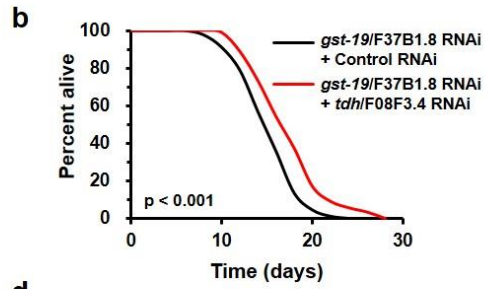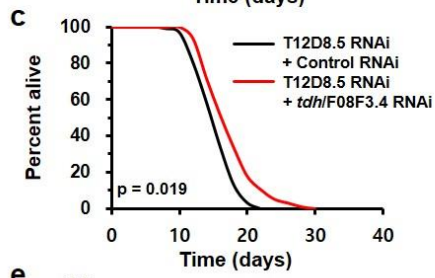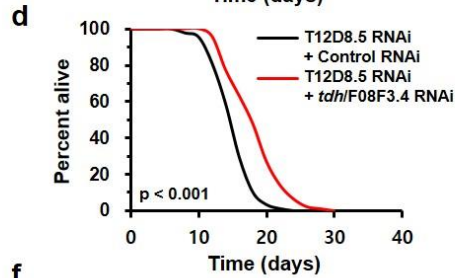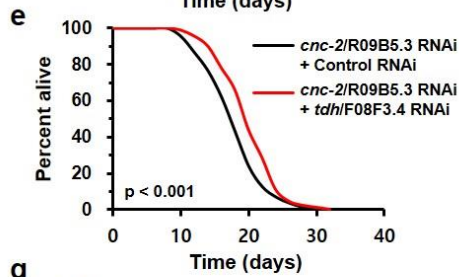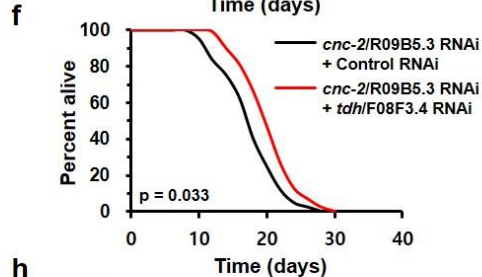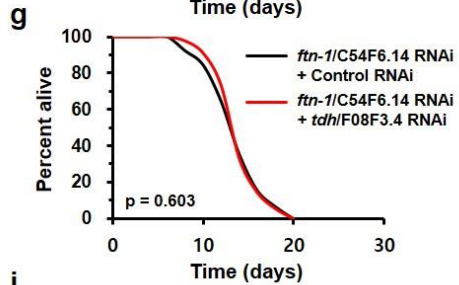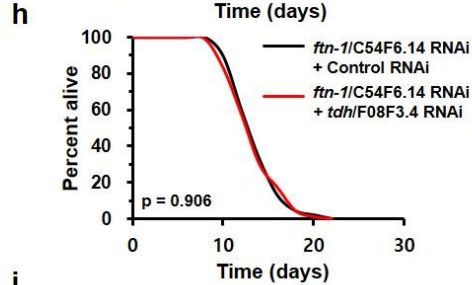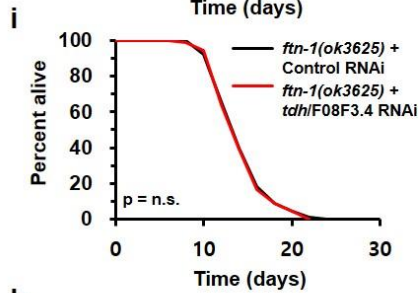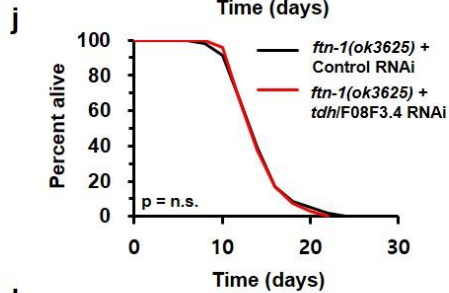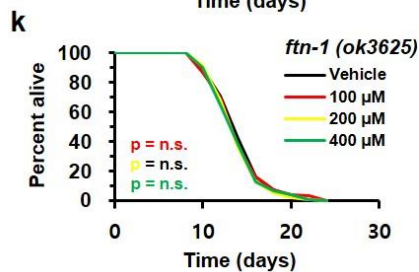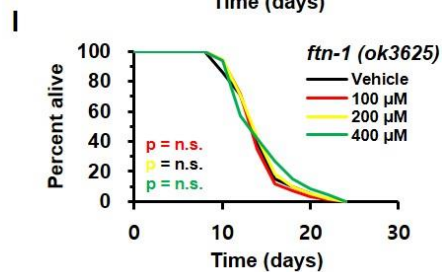

**Supplementary Fig.6 | FTN-1 is necessary for threonine-mediated lifespan extension.** **a-b**, Survival curves depicted in Fig. 4a with additional replicates. **c-d**, Survival curves depicted in Fig. 4b with additional replicates. **e-f**, Survival curves depicted in Fig. 4c with additional replicates. **g-h**, Survival curves depicted in Fig. 4d with additional replicates. **i-j**, Survival curves depicted in Fig. 4e with additional replicates. **k-l**, Survival curves depicted in Fig. 4f with additional replicates. P-values listed in figure panel and survival data are presented in Supplementary Table 1.

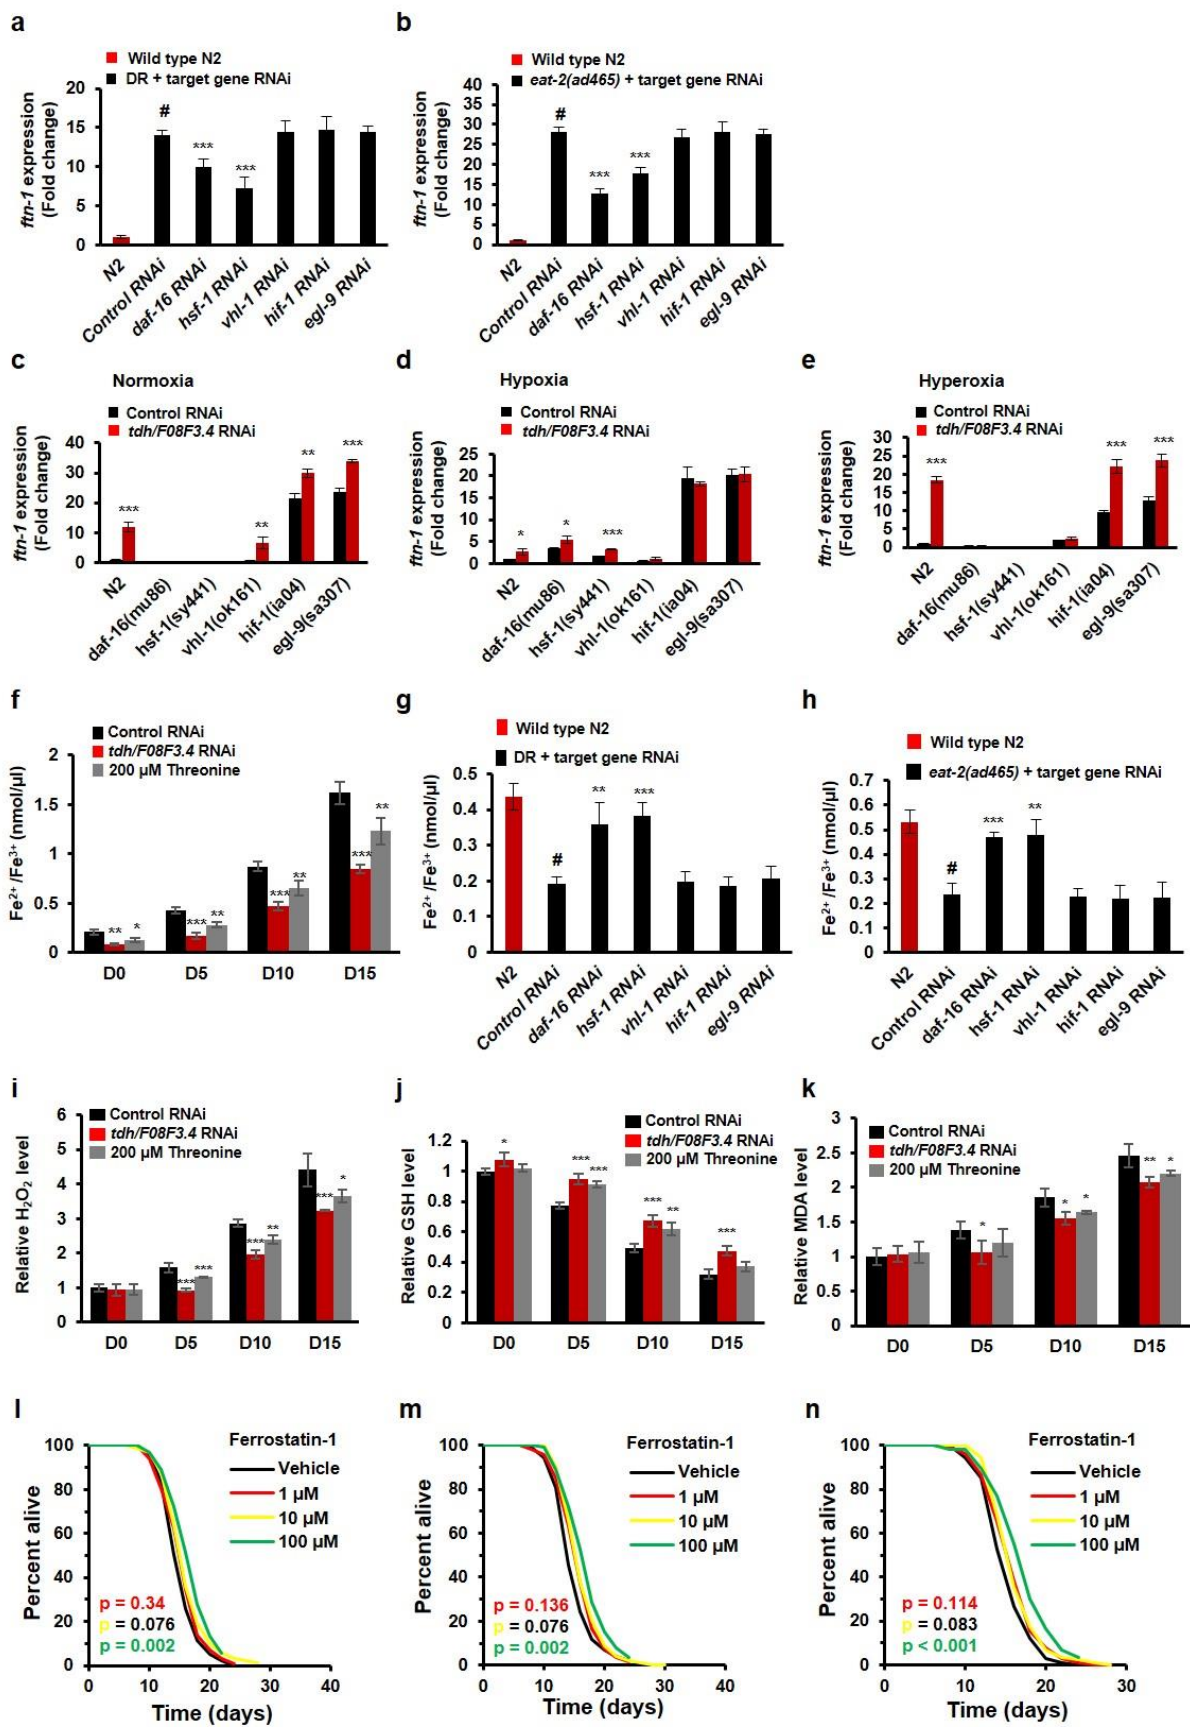

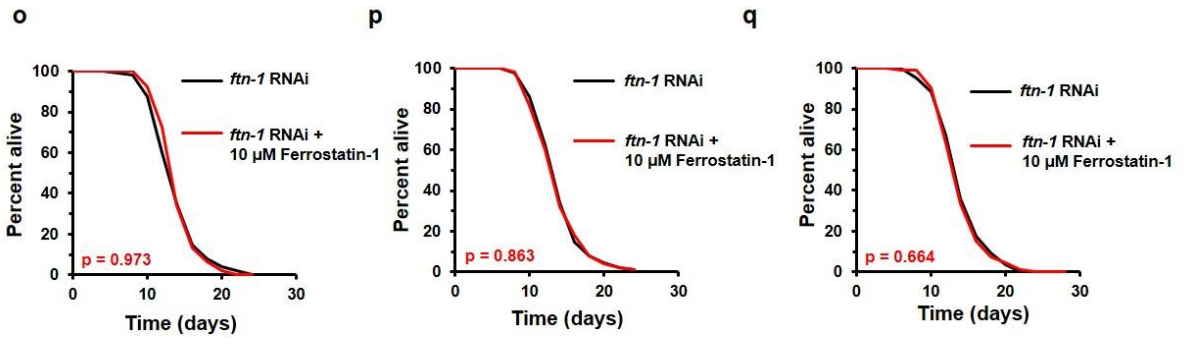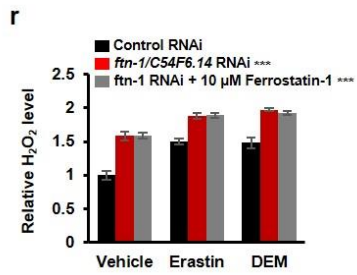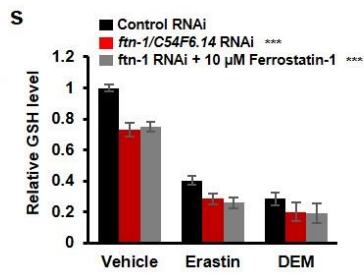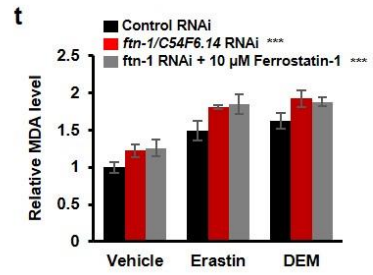



**Supplementary Fig.7 | Increased threonine attenuates ferroptosis by abrogating ROS, lipid peroxidation, and GSH depletion. a-b**, Expression levels of *ftn-1* at **a**, DR, or **b**, *eat-2* mutant with target gene RNAi (#p < 0.001 compared to N2, \*\*\*p < 0.001 versus control RNAi, one-way ANOVA, n = 3 worm pellets). **c-e**, Expression of *ftn-1* with *tdh/F08F3.4* RNAi at the various mutants that are related to the regulation of *ftn-1* transcription. Worms were treated under **c**, normoxia (21% O<sub>2</sub>), **d**, hypoxia (2% O<sub>2</sub>), and **e**, hyperoxia (0.4M PQ) for 3 h (\*p < 0.05, \*\*p < 0.01, and \*\*\*p < 0.001 versus the control RNAi, one-way ANOVA, n =3 worm pellets). **f**, Quantification of Fe<sup>2+</sup> /Fe<sup>3+</sup> iron contents of nematode at intervals across lifespan (\*p < 0.05, \*\*p < 0.01, and \*\*\*p < 0.001 versus the vehicle group, one-way ANOVA, n = 3 worm pellets). **g-h**, Fe<sup>2+</sup> /Fe<sup>3+</sup> iron content levels of **(g)** DR or **(h)** *eat-2* mutants with the target gene RNAi were measured (#p < 0.001 compared to N2, \*\*p < 0.01 and \*\*\*p < 0.001 versus control RNAi, one-way ANOVA, n =3 worm pellets). **i**, Relative Amplex Red fluorescence in supernatant of worms (\*p < 0.05, \*\*p < 0.01, and \*\*\*p < 0.001 versus control group, one-way ANOVA, n = 3 worm pellets). **j**, Total glutathione (GSH) level was normalized to the GSH level in worms not exposed to *tdh/F08F3.4* RNAi or threonine (\*p < 0.05, \*\*p < 0.01, and \*\*\*p < 0.001 versus control, one-way ANOVA, n = 3 worm pellets). **k**, Levels of the lipid peroxidation end product, malondialdehyde (MDA), were measured and normalized against the mean of untreated worms for independent samples (\*p < 0.05 and \*\*p < 0.05 versus control, one-way ANOVA, n = 3 worm pellets). **l-n**, Survival curves of ferrostatin-1 intervention with additional replicates. **o-q**, Survival curves of *ftn-1* RNAi with 10 μM ferrostatin-1 administration with additional repeats. P-values listed in figure panel and survival data are presented in Supplementary Table 1. **r**, Relative Amplex Red fluorescence in supernatant of worms (\*\*\*p < 0.001 versus control group, one-way ANOVA, n = 3 worm pellets). **s**, Total GSH level was

normalized to the GSH level in worms not exposed to *ftn-1* RNAi and ferrostatin-1 (\*\*p < 0.001 versus control, one-way ANOVA, n = 3 worm pellets). **t**, Levels of the MDA were measured and normalized against the mean of untreated worms for independent samples (\*\*p < 0.001 versus control, one-way ANOVA, n = 3 worm pellets).



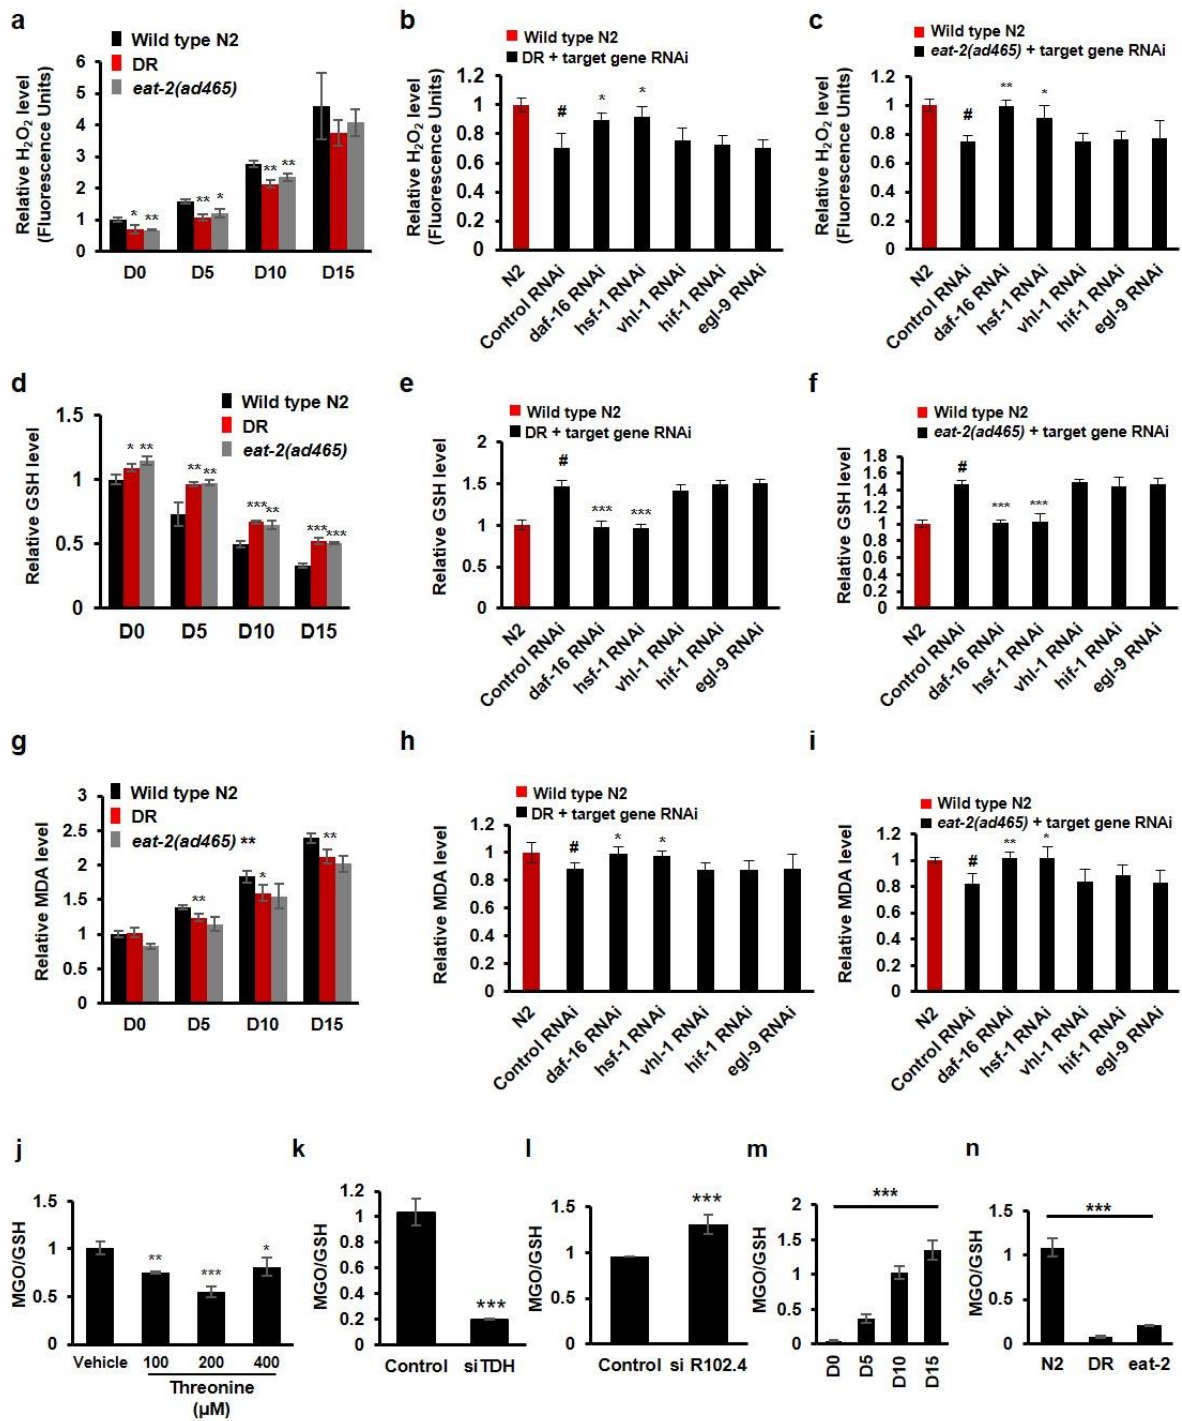

**o**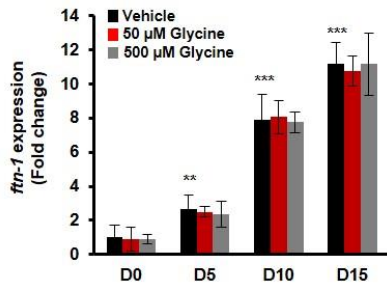**p**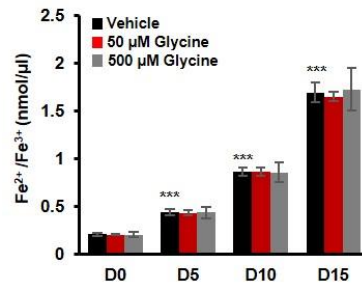**q**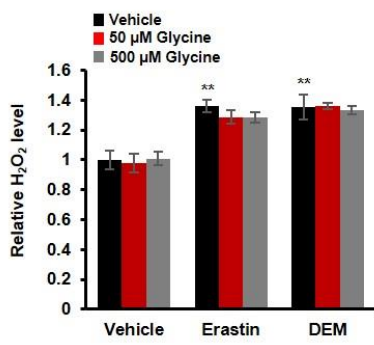**r**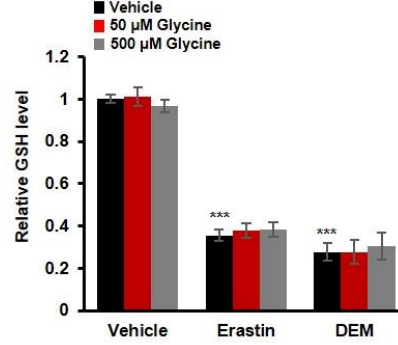**s**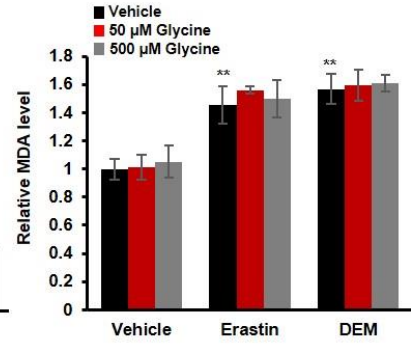

**Supplementary Fig.8 | DR represented decreased ferroptosis in the manner of DAF-16 and HSF-1 and increasing threonine lowered age-associated factors. a,** Relative Amplex Red fluorescence in supernatant of worm strains at intervals across lifespan (\*p < 0.05 and \*\*p < 0.01 versus the N2 group, one-way ANOVA, n = 3 worm pellets). **b-c,** Relative ROS level of **(b)** DR and **(c)** *eat-2* mutant with target gene RNAi (#p < 0.001 compared to N2, \*p < 0.05 and \*\*p < 0.01 versus the control RNAi, one-way ANOVA, n = 3 worm pellets). **d,** Relative GSH levels of worm strains at intervals across lifespan (\*p < 0.05, \*\*p < 0.01, and \*\*\*p < 0.001 versus N2, one-way ANOVA, n = 3 worm pellets). **e-f,** Relative GSH level of **(e)** DR and **(f)** *eat-2* mutant with target gene RNAi (#p < 0.001 compared to N2, \*\*\*p < 0.001 versus the control RNAi, one-way ANOVA, n = 3 worm pellets). **g,** Relative MDA levels of worm strains at intervals across lifespan (\*p < 0.05 and \*\*p < 0.01 versus N2, one-way ANOVA, n = 3 worm pellets). **h-i,** Relative MDA in **(h)** DR and **(i)** *eat-2* mutant with target gene RNAi (#p < 0.001 compared to N2, \*p < 0.05 and \*\*p < 0.01 versus control the RNAi, one-way ANOVA, n = 3 worm pellets). **j-n,** MGO/GSH levels under **(j)** threonine treatment (\*p < 0.05, \*\*p < 0.01, and \*\*\*p < 0.001 versus the vehicle, one-way ANOVA, n = 3 worm pellet), **(k)** *tdh/F08F3.4* RNAi, **(l)** *R102.4* RNAi (\*\*\*p < 0.001 versus control RNAi, Student's t-test, n = 3 worm pellets), **(m)** interval time points (\*\*\*p < 0.001 versus Day 0, one-way ANOVA, n = 3 worm pellet), and **(n)** N2, DR, and *eat-2* mutant (\*\*\*p < 0.001 versus N2, one-way ANOVA, n = 3 worm pellet). **o,** Expression of *ftn-1* with 50 and 500  $\mu$ M of glycine treatment (\*\*p < 0.01, and \*\*\*p < 0.001 versus the day 0 vehicle, one-way ANOVA, n = 3 worm pellets). **p,** Quantification of  $Fe^{2+} / Fe^{3+}$  iron contents of nematode at intervals across lifespan with glycine treatment (\*\*\*p < 0.001 versus the day 0 vehicle group, one-way ANOVA, n = 3 worm pellets). **q,** Relative Amplex Red fluorescence in supernatant of worms (\*\*p < 0.01, versus day 0 vehicle group, one-

way ANOVA, n = 3 worm pellets). **r**, Total glutathione (GSH) level was normalized to the GSH level in worms not exposed to glycine (\*\*p < 0.001 versus vehicle, one-way ANOVA, n = 3 worm pellets). **s**, Levels of the MDA were measured and normalized against the mean of untreated worms for independent samples (\*\*p < 0.001 versus vehicle, one-way ANOVA, n = 3 worm pellets). Error bars represent the mean  $\pm$  s.d.

**Supplementary Table 1 | Summary of lifespan data**

| Strain | Treatment      | Mean lifespan (days) ± SEM | % difference | P-value    | n (animals) | Figure                |     |
|--------|----------------|----------------------------|--------------|------------|-------------|-----------------------|-----|
| N2     | Vehicle        | 15.7 ± 0.3                 |              |            | 90          | Fig. 1c               |     |
|        | 100            | 17.2 ± 0.4                 | 9.5          | 0.01318723 | 90          |                       |     |
|        | 200            | 18.5 ± 0.4                 | 18           | 9.818E-06  | 87          |                       |     |
|        | Threonine (µM) | 400                        | 16.5 ± 0.3   | 5.4        | 0.02632925  |                       | 89  |
|        | 800            | 15.1 ± 0.3                 | -3.5         | 0.29197009 | 88          |                       |     |
|        | 1000           | 15.5 ± 0.3                 | -1.3         | 0.47151619 | 90          |                       |     |
|        | 2000           | 15.4 ± 0.3                 | -1.9         | 0.39110771 | 83          |                       |     |
| N2     | Vehicle        | 15.7 ± 0.3                 |              |            | 90          | Supplementary Fig. 1a |     |
|        | 100            | 17.4 ± 0.4                 | 10.8         | 0.025      | 92          |                       |     |
|        | 200            | 18.4 ± 0.4                 | 17.3         | 4.0351E-05 | 92          |                       |     |
|        | Threonine (µM) | 400                        | 16.5 ± 0.3   | 5          | 0.03624563  |                       | 89  |
|        | 800            | 15.2 ± 0.3                 | -3.1         | 0.24118061 | 93          |                       |     |
|        | 1000           | 15.4 ± 0.3                 | -1.9         | 0.24921714 | 91          |                       |     |
|        | 2000           | 15.6 ± 0.3                 | -0.8         | 0.29940049 | 91          |                       |     |
| N2     | Vehicle        | 15.8 ± 0.3                 |              |            | 89          | Supplementary Fig. 1b |     |
|        | 100            | 17.1 ± 0.4                 | 8.7          | 0.01828145 | 91          |                       |     |
|        | 200            | 18.2 ± 0.4                 | 15.7         | 2.8716E-05 | 96          |                       |     |
|        | Threonine (µM) | 400                        | 16.9 ± 0.3   | 7.4        | 0.02617666  |                       | 96  |
|        | 800            | 15.9 ± 0.3                 | 0.9          | 0.60101601 | 95          |                       |     |
|        | 1000           | 15.5 ± 0.3                 | -1.8         | 0.695817   | 93          |                       |     |
|        | 2000           | 15.3 ± 0.3                 | -2.7         | 0.56453947 | 93          |                       |     |
| N2     | Vehicle        | 15.3 ± 0.2                 |              |            | 92          | Supplementary Fig.1h  |     |
|        | Threonine (mM) | 10                         | 7.1 ± 0.2    | 8.8        | 0.03367001  |                       | 93  |
|        | 20             | 8.1 ± 0.3                  | 16.5         | 0.00012714 | 108         |                       |     |
|        | 40             | 7.6 ± 0.2                  | -11.6        | 0.02688507 | 93          |                       |     |
| N2     | Vehicle        | 15.4 ± 0.3                 |              |            | 106         | Supplementary Fig.1i  |     |
|        | Threonine (mM) | 10                         | 7.5 ± 0.3    | 8.3        | 0.09166065  |                       | 98  |
|        | 20             | 7.5 ± 0.3                  | 18.4         | 1.5278E-05 | 110         |                       |     |
|        | 40             | 8.0 ± 0.4                  | -9.6         | 0.01066835 | 93          |                       |     |
| N2     | Vehicle        | 15.9 ± 0.2                 |              |            | 98          | Supplementary Fig.1j  |     |
|        | Threonine (mM) | 10                         | 7.4 ± 0.2    | 7.2        | 0.18277221  |                       | 105 |
|        | 20             | 7.4 ± 0.2                  | 13.5         | 0.00141251 | 115         |                       |     |
|        | 40             | 7.0 ± 0.2                  | -11.3        | 0.03745759 | 107         |                       |     |
| N2     | Control RNAi   | 14.6 ± 0.3                 |              |            | 92          | 2k                    |     |
|        | TDH RNAi       | 19.5 ± 0.4                 | 33.4         | 4.1701E-14 | 96          |                       |     |

|                      |              |         |            |       |            |     |                       |
|----------------------|--------------|---------|------------|-------|------------|-----|-----------------------|
| N2                   | Control RNAi |         | 15.8 ± 0.3 |       |            | 88  | Supplementary Fig. 2b |
|                      | TDH RNAi     |         | 21.5 ± 0.5 | 36.1  | 1.5979E-09 | 90  |                       |
| N2                   | Control RNAi |         | 15.2 ± 0.3 |       |            | 91  | Supplementary Fig. 2c |
|                      | TDH RNAi     |         | 20.3 ± 0.4 | 33.6  | 3.5476E-11 | 94  |                       |
| N2                   | Control RNAi |         | 15.6 ± 0.3 |       |            | 96  | Supplementary Fig. 3a |
|                      | R102.4 RNAi  |         | 13.0 ± 0.2 | -16.8 | 0.00015631 | 94  |                       |
| N2                   | Control RNAi |         | 15.7 ± 0.3 |       |            | 90  | Supplementary Fig. 3b |
|                      | R102.4 RNAi  |         | 13.1 ± 0.2 | -16.5 | 3.6303E-06 | 95  |                       |
| N2                   | Control RNAi |         | 14.7 ± 0.3 |       |            | 90  | Supplementary Fig. 3c |
|                      | R102.4 RNAi  |         | 12.7 ± 0.3 | -13.6 | 0.00875291 | 95  |                       |
| <i>eat-2(ad1116)</i> | Control RNAi |         | 21.7 ± 0.4 |       |            | 102 | 3d                    |
|                      | TDH RNAi     |         | 21.6 ± 0.4 | -0.4  | 0.785831   | 97  |                       |
| <i>eat-2(ad1116)</i> | Control RNAi |         | 21.8 ± 0.4 |       |            | 94  | Supplementary Fig. 4d |
|                      | TDH RNAi     |         | 21.2 ± 0.5 | -2.6  | 0.97644574 | 94  |                       |
| <i>eat-2(ad1116)</i> | Control RNAi |         | 21.4 ± 0.5 |       |            | 93  | Supplementary Fig. 4e |
|                      | TDH RNAi     |         | 20.9 ± 0.5 | -2.3  | 0.42830439 | 96  |                       |
| <i>eat-2(ad1116)</i> |              | Vehicle | 21.3 ± 0.4 |       |            | 91  | Supplementary Fig. 5a |
|                      |              | 100     | 21.1 ± 0.4 | -0.7  | 0.82883163 | 91  |                       |
|                      |              | 200     | 20.4 ± 0.3 | -3.8  | 0.19526359 | 88  |                       |
|                      |              | 400     | 20.7 ± 0.4 | -2.9  | 0.91731597 | 88  |                       |
| <i>eat-2(ad1116)</i> |              | Vehicle | 21.0 ± 0.3 |       |            | 98  | Supplementary Fig. 5b |
|                      |              | 100     | 21.2 ± 0.4 | 0.8   | 0.47588931 | 91  |                       |
|                      |              | 200     | 20.4 ± 0.3 | -2.8  | 0.3479877  | 94  |                       |
|                      |              | 400     | 20.5 ± 0.4 | -2.3  | 0.69626906 | 97  |                       |
| <i>eat-2(ad1116)</i> |              | Vehicle | 21.0 ± 0.4 |       |            | 96  | Supplementary Fig. 5c |
|                      |              | 100     | 21.0 ± 0.4 | 0.3   | 0.61436981 | 90  |                       |
|                      |              | 200     | 20.4 ± 0.3 | -2.7  | 0.31910299 | 94  |                       |
|                      |              | 400     | 21.0 ± 0.7 | -2.6  | 0.78454987 | 93  |                       |
| <i>daf-2(e1370)</i>  | Control RNAi |         | 22.5 ± 0.5 |       |            | 93  | 3e                    |
|                      | TDH RNAi     |         | 25.9 ± 0.6 | 15.1  | 0.00024409 | 97  |                       |
| <i>daf-2(e1370)</i>  | Control RNAi |         | 22.2 ± 0.5 |       |            | 96  | Supplementary Fig. 4f |
|                      | TDH RNAi     |         | 25.8 ± 0.6 | 16.2  | 0.00021323 | 96  |                       |
| <i>daf-2(e1370)</i>  | Control RNAi |         | 22.3 ± 0.5 |       |            | 95  |                       |

|                      |                   |     |            |      |            |     |                              |
|----------------------|-------------------|-----|------------|------|------------|-----|------------------------------|
|                      | TDH RNAi          |     | 25.5 ± 0.6 | 14.6 | 0.00222086 | 102 | Supplem<br>entary<br>Fig. 4g |
| <i>daf-2(e1370)</i>  |                   |     | 22.6 ± 0.5 |      |            | 92  |                              |
|                      | Threonine<br>(μM) | 100 | 25.1 ± 0.5 | 10.9 | 0.01662628 | 97  | Supplem<br>entary<br>Fig. 5d |
|                      |                   | 200 | 25.3 ± 0.6 | 11.7 | 0.00382294 | 100 |                              |
|                      |                   | 400 | 22.2 ± 0.5 | -1.8 | 0.87212671 | 96  |                              |
| <i>daf-2(e1370)</i>  |                   |     | 22.3 ± 0.5 |      |            | 92  |                              |
|                      | Threonine<br>(μM) | 100 | 24.5 ± 0.5 | 9.5  | 0.05007683 | 94  | Supplem<br>entary<br>Fig. 5e |
|                      |                   | 200 | 25.2 ± 0.5 | 12.6 | 0.00273856 | 97  |                              |
|                      |                   | 400 | 21.9 ± 0.5 | -2.1 | 0.70293411 | 94  |                              |
| <i>daf-2(e1370)</i>  |                   |     | 22.7 ± 0.5 |      |            | 89  |                              |
|                      | Threonine<br>(μM) | 100 | 24.5 ± 0.6 | 8    | 0.03400012 | 86  | Supplem<br>entary<br>Fig. 5f |
|                      |                   | 200 | 25.0 ± 0.5 | 10.4 | 0.01544843 | 92  |                              |
|                      |                   | 400 | 21.9 ± 0.5 | -3.2 | 0.83582142 | 88  |                              |
| <i>daf-16(mu86)</i>  | Control<br>RNAi   |     | 13.0 ± 0.3 |      |            | 102 | 3f                           |
|                      | TDH RNAi          |     | 13.5 ± 0.3 | 0.9  | 0.62725723 | 99  |                              |
| <i>daf-16(mu86)</i>  | Control<br>RNAi   |     | 12.9 ± 0.3 |      |            | 97  | Supplem<br>entary<br>Fig. 4h |
|                      | TDH RNAi          |     | 13.5 ± 0.3 | 4.5  | 0.36382365 | 95  |                              |
| <i>daf-16(mu86)</i>  | Control<br>RNAi   |     | 12.8 ± 0.3 |      |            | 93  | Supplem<br>entary<br>Fig. 4i |
|                      | TDH RNAi          |     | 12.8 ± 0.3 | 0.6  | 0.79278221 | 92  |                              |
| <i>daf-16(mu86)</i>  |                   |     | 12.9 ± 0.3 |      |            | 87  |                              |
|                      | Threonine<br>(μM) | 100 | 13.3 ± 0.3 | 2.9  | 0.48525786 | 89  | Supplem<br>entary<br>Fig. 5g |
|                      |                   | 200 | 13.7 ± 0.3 | 6.4  | 0.16755809 | 87  |                              |
|                      |                   | 400 | 13.2 ± 0.3 | 1.8  | 0.34965062 | 90  |                              |
| <i>daf-16(mu86)</i>  |                   |     | 12.7 ± 0.3 |      |            | 92  |                              |
|                      | Threonine<br>(μM) | 100 | 13.2 ± 0.3 | 4.6  | 0.50873332 | 97  | Supplem<br>entary<br>Fig. 5h |
|                      |                   | 200 | 12.7 ± 0.3 | 0.5  | 0.50153425 | 93  |                              |
|                      |                   | 400 | 12.5 ± 0.4 |      | 0.85684873 | 94  |                              |
| <i>daf-16(mu86)</i>  |                   |     | 12.3 ± 0.3 |      |            | 93  |                              |
|                      | Threonine<br>(μM) | 100 | 13.0 ± 0.3 | 5    | 0.32790939 | 95  | Supplem<br>entary<br>Fig. 5i |
|                      |                   | 200 | 12.7 ± 0.3 | 3.2  | 0.4104227  | 95  |                              |
|                      |                   | 400 | 12.2 ± 0.3 | -1   | 0.65040023 | 92  |                              |
| <i>hsf-1 (sy441)</i> | Control<br>RNAi   |     | 8.0 ± 0.3  |      |            | 80  | 3g                           |
|                      | TDH RNAi          |     | 8.2 ± 0.3  | 2.7  | 0.49201391 | 83  |                              |
| <i>hsf-1 (sy441)</i> | Control<br>RNAi   |     | 7.8 ± 0.3  |      |            | 86  | Supplem<br>entary<br>Fig. 4j |
|                      | TDH RNAi          |     | 7.8 ± 0.2  | 1    | 0.83963669 | 90  |                              |
| <i>hsf-1 (sy441)</i> | Control<br>RNAi   |     | 7.2 ± 0.2  |      |            | 91  |                              |

|                      |                   |     |            |      |            |    |                              |
|----------------------|-------------------|-----|------------|------|------------|----|------------------------------|
|                      | TDH RNAi          |     | 7.2 ± 0.3  | 1    | 0.94061687 | 89 | Supplem<br>entary<br>Fig. 4k |
| <i>hsf-1 (sy441)</i> |                   |     | 7.5 ± 0.2  |      |            | 98 |                              |
| <i>hsf-1 (sy441)</i> | Threonine<br>(μM) | 100 | 7.1 ± 0.2  | -5.7 | 0.54254055 | 98 | Supplem<br>entary<br>Fig. 5j |
| <i>hsf-1 (sy441)</i> |                   | 200 | 8.1 ± 0.3  | 7.6  | 0.28327525 | 98 |                              |
| <i>hsf-1 (sy441)</i> |                   | 400 | 7.6 ± 0.2  | 0.9  | 0.28874204 | 99 |                              |
| <i>hsf-1 (sy441)</i> |                   |     | 7.9 ± 0.3  |      |            | 86 |                              |
| <i>hsf-1 (sy441)</i> | Threonine<br>(μM) | 100 | 7.5 ± 0.3  | 0.9  | 0.58359758 | 95 | Supplem<br>entary<br>Fig. 5k |
| <i>hsf-1 (sy441)</i> |                   | 200 | 7.5 ± 0.3  | -5.1 | 0.54965683 | 89 |                              |
| <i>hsf-1 (sy441)</i> |                   | 400 | 8.0 ± 0.4  | 2    | 0.70293555 | 96 |                              |
| <i>hsf-1 (sy441)</i> |                   |     | 7.2 ± 0.2  |      |            | 81 |                              |
| <i>hsf-1 (sy441)</i> | Threonine<br>(μM) | 100 | 7.4 ± 0.2  | 3.3  | 0.4769379  | 90 | Supplem<br>entary<br>Fig. 5l |
| <i>hsf-1 (sy441)</i> |                   | 200 | 7.4 ± 0.2  | 2.9  | 0.38189565 | 93 |                              |
| <i>hsf-1 (sy441)</i> |                   | 400 | 7.0 ± 0.2  | -3.1 | 0.42616027 | 99 |                              |
| N2                   | Control<br>RNAi   |     | 14.8 ± 0.3 |      |            | 88 | 4a                           |
|                      | gst-19<br>RNAi    |     | 16.3 ± 0.4 | 18.1 | 0.00011133 | 87 |                              |
| N2                   | Control<br>RNAi   |     | 15.3 ± 0.3 |      |            | 87 | Supplem<br>entary<br>Fig. 6a |
|                      | gst-19<br>RNAi    |     | 18.5 ± 0.5 | 21.1 | 1.5979E-09 | 90 |                              |
| N2                   | Control<br>RNAi   |     | 15.6 ± 0.3 |      |            | 90 | Supplem<br>entary<br>Fig. 6b |
|                      | gst-19<br>RNAi    |     | 17.7 ± 0.4 | 13.8 | 0.01044407 | 89 |                              |
| N2                   | Control<br>RNAi   |     | 15.7 ± 0.3 |      |            | 91 | 4b                           |
|                      | T12D8.5<br>RNAi   |     | 20.5 ± 0.5 | 13.2 | 0.01854408 | 95 |                              |
| N2                   | Control<br>RNAi   |     | 15.5 ± 0.2 |      |            | 91 | Supplem<br>entary<br>Fig. 6c |
|                      | T12D8.5<br>RNAi   |     | 19.8 ± 0.5 | 21.2 | 6.7349E-09 | 92 |                              |
| N2                   | Control<br>RNAi   |     | 15.3 ± 0.3 |      |            | 85 | Supplem<br>entary<br>Fig. 6d |
|                      | T12D8.5<br>RNAi   |     | 20.6 ± 0.4 | 15.6 | 0.00980001 | 88 |                              |
| N2                   | Control<br>RNAi   |     | 18.4 ± 0.4 |      |            | 85 | 4c                           |
|                      | cnc-2 RNAi        |     | 20.5 ± 0.5 | 11.1 | 0.02717264 | 87 |                              |
| N2                   | Control<br>RNAi   |     | 18.2 ± 0.4 |      |            | 89 | Supplem<br>entary<br>Fig. 6e |
|                      | cnc-2 RNAi        |     | 20.4 ± 0.4 | 12.1 | 0.00148891 | 91 |                              |
| N2                   | Control<br>RNAi   |     | 18.0 ± 0.4 |      |            | 85 | Supplem<br>entary<br>Fig. 6f |
|                      | cnc-2 RNAi        |     | 20.6 ± 0.4 | 14.4 | 0.03255776 | 88 |                              |
| N2                   | Control<br>RNAi   |     | 14.0 ± 0.2 |      |            | 92 | 4d                           |
|                      | ftn-1 RNAi        |     | 14.0 ± 0.3 | -0.2 | 0.75088368 | 89 |                              |



|                       |                    |         |            |       |                 |     |                       |
|-----------------------|--------------------|---------|------------|-------|-----------------|-----|-----------------------|
| N2                    | Control RNAi       |         | 14.0 ± 0.3 |       |                 | 90  | Supplementary Fig. 6g |
|                       | ftn-1 RNAi         |         | 14.3 ± 0.3 | 2.4   | 0.60254214      | 90  |                       |
| N2                    | Control RNAi       |         | 14.0 ± 0.2 |       |                 | 95  | Supplementary Fig. 6h |
|                       | ftn-1 RNAi         |         | 13.8 ± 0.2 | -1.4  | 0.90572168      | 94  |                       |
| <i>ftn-1 (ok3625)</i> | Control RNAi       |         | 14.5 ± 0.3 |       |                 | 100 | 4e                    |
|                       | TDH RNAi           |         | 14.5 ± 0.3 | 0.3   | 0.82261213      | 102 |                       |
| <i>ftn-1 (ok3625)</i> | Control RNAi       |         | 14.6 ± 0.3 |       |                 | 93  | Supplementary Fig. 6i |
|                       | TDH RNAi           |         | 14.5 ± 0.3 | -0.6  | 0.9317674       | 92  |                       |
| <i>ftn-1 (ok3625)</i> | Control RNAi       |         | 14.6 ± 0.3 |       |                 | 96  | Supplementary Fig. 6j |
|                       | TDH RNAi           |         | 14.5 ± 0.3 | -0.1  | 0.68241871      | 95  |                       |
| <i>ftn-1 (ok3625)</i> |                    |         | 14.5 ± 0.3 |       |                 | 89  | 4f                    |
|                       | Threonine (μM)     | 100     | 14.5 ± 0.3 | -0.38 | 0.83269299      | 91  |                       |
|                       |                    | 200     | 14.4 ± 0.3 | -1.66 | 0.8348663       | 95  |                       |
|                       |                    | 400     | 14.6 ± 0.4 | 0.5   | 0.89492254      | 92  |                       |
| <i>ftn-1 (ok3625)</i> |                    |         | 14.6 ± 0.3 |       |                 | 93  | Supplementary Fig. 6k |
|                       | Threonine (μM)     | 100     | 14.5 ± 0.3 | -0.6  | 0.86549436      | 92  |                       |
|                       |                    | 200     | 14.3 ± 0.3 | -1.6  | 0.50980404      | 92  |                       |
|                       |                    | 400     | 14.4 ± 0.3 | -1.4  | 0.68673723      | 92  |                       |
| <i>ftn-1 (ok3625)</i> |                    |         | 14.5 ± 0.3 |       |                 | 92  | Supplementary Fig. 6l |
|                       | Threonine (μM)     | 100     | 14.5 ± 0.3 | -0.4  | 0.38539193      | 95  |                       |
|                       |                    | 200     | 14.9 ± 0.3 | 2.4   | 0.92239689      | 92  |                       |
|                       |                    | 400     | 14.9 ± 0.4 | 2.9   | 0.74442601      | 93  |                       |
| N2                    |                    | Vehicle | 15.5 ± 0.3 |       |                 | 97  | Supplementary Fig. 7l |
|                       | Ferrostatin-1 (μM) | 1       | 15.9 ± 0.3 | 5.9   | 0.34030527<br>7 | 102 |                       |
|                       |                    | 10      | 8.1 ± 0.3  | 6.5   | 0.07583697<br>3 | 89  |                       |
|                       |                    | 100     | 7.6 ± 0.2  | 11    | 0.00174332<br>5 | 126 |                       |
| N2                    |                    | Vehicle | 15.4 ± 0.3 |       |                 | 103 | Supplementary Fig. 7m |
|                       | Ferrostatin-1 (μM) | 1       | 16.2 ± 0.3 | 5.3   | 0.13566699<br>9 | 120 |                       |
|                       |                    | 10      | 7.5 ± 0.3  | 8     | 0.07605720<br>4 | 103 |                       |
|                       |                    | 100     | 8.0 ± 0.4  | 13    | 0.00186026<br>2 | 118 |                       |
| N2                    |                    | Vehicle | 15.5 ± 0.3 |       |                 | 108 | Supplementary Fig. 7n |
|                       | Ferrostatin-1 (μM) | 1       | 16.3 ± 0.3 | 4.8   | 0.11429497<br>8 | 104 |                       |
|                       |                    | 10      | 7.4 ± 0.2  | 7     | 0.08270303<br>4 | 85  |                       |
|                       |                    | 100     | 7.0 ± 0.2  | 13    | 7.95786E-<br>05 | 116 |                       |
| N2                    | ftn-1 RNAi         | Vehicle | 14.2 ± 0.2 |       |                 | 103 | Supplement            |

|    |            |                           |                |      |                 |     |                         |
|----|------------|---------------------------|----------------|------|-----------------|-----|-------------------------|
|    |            | 10 $\mu$ M<br>ferrostatin | 14.4 $\pm$ 0.3 | 1.9  | 0.97251440<br>1 | 91  | Supplementary<br>Fig.7o |
| N2 | ftn-1 RNAi | Vehicle                   | 14.2 $\pm$ 0.1 |      |                 | 88  | Supplementary<br>Fig.7p |
|    |            | 10 $\mu$ M<br>ferrostatin | 14.1 $\pm$ 0.2 | -0.9 | 0.86328262<br>7 | 100 |                         |
| N2 | ftn-1 RNAi | Vehicle                   | 14.3 $\pm$ 0.2 |      |                 | 86  | Supplementary<br>Fig.7q |
|    |            | 10 $\mu$ M<br>ferrostatin | 14.3 $\pm$ 0.3 | -0.6 | 0.66367546<br>7 | 93  |                         |

**Supplementary Table 2 | Sequences of qPCR primers**

| Primer           | Sequence_Fwd              | Sequence_Rev              |
|------------------|---------------------------|---------------------------|
| <i>tdh</i>       | TCGCGTTAACGCTAGCATGGATCTC | GTAACATCAGAGATTTTGAGACAC  |
| <i>R102.4</i>    | GGCGAGGAGATAATCGTCGG      | GTGACAATCGGGTATACTCGTCA   |
| <i>gst-19</i>    | TCGCGTTAACGCTAGCATGGATCTC | GTAACATCAGAGATTTTGAGACAC  |
| <i>T12D8.5</i>   | TCGCGTTAACGCTAGCATGGATCTC | GTAACATCAGAGATTTTGAGACAC  |
| <i>cnc-2</i>     | TCGCGTTAACGCTAGCATGGATCTC | GTAACATCAGAGATTTTGAGACAC  |
| <i>ftn-1</i>     | TCGCGTTAACGCTAGCATGGATCTC | GTAACATCAGAGATTTTGAGACAC  |
| <i>daf-16</i>    | GCGAATCGGTTCCAGCAATTCCAA  | ATCCACGGACACTGTTCAACTCGT  |
| <i>hsf-1</i>     | GGAAAGTGGTCCACATCGAG      | TTCACTCTCCCGCAGGATGG      |
| <i>hif-1</i>     | CAGTGATTCTTCAATTCTTTACGTC | GGATTAACACAGACAGATTTAACAG |
| <i>egl-9</i>     | GCCGACTTTCAATCCACTTC      | AATGATCGGAGATCGACTGG      |
| <i>actin</i>     | GAGAGGGAAATCGTGCGTGAC     | CATCTGCTGGAAGGTGGACA      |
| <i>cdc-42</i>    | CTGCTGGACAGGAAGATTACG     | CTCGGACATTCTCGAATGAAG     |
| <i>Y45F10D.4</i> | GTCGCTTCAAATCAGTTCAG      | GTTCTTGTCAAGTGATCCGACA    |
